# Supplementary material for: Signatures of positive selection apparent in a small sample of human exomes
Source: HighWire-hosted journal article supplement (doi:10.1101/gr.106161.110), 2010-08-06

**Supplementary Figure 1.** Polymorphism in Europe versus Africa. The axes show  $\pi$  for each continent. Color darkness is proportional to the density of 100-kb regions in that vicinity. Polymorphism is positively correlated among continents ( $R^2 = 0.55$ ). Approximately 15% of regions show no polymorphism on either continent (large dark spot in lower left corner).

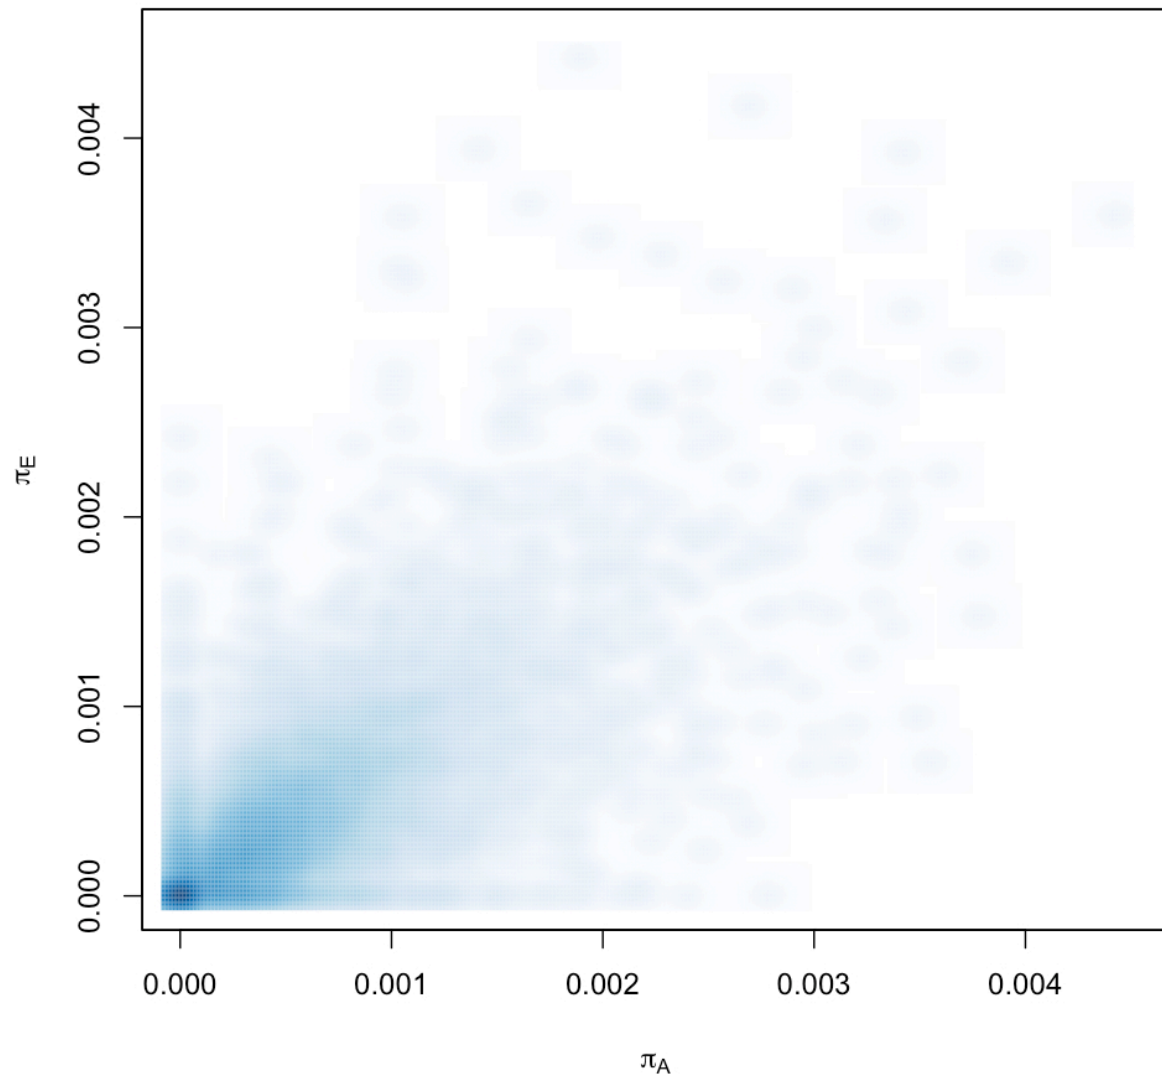

**Supplementary Figure 2.** Distribution of Tajima's D in Europe and Africa. Color darkness is proportional to the density of 100-kb regions in that vicinity. This statistic is slightly lower in Africa and is weakly positively correlated between continents ( $R^2 = 0.01$ ). Approximately 15% of regions show no polymorphism on either continent, and thus have a D value of zero (large central dark spot).

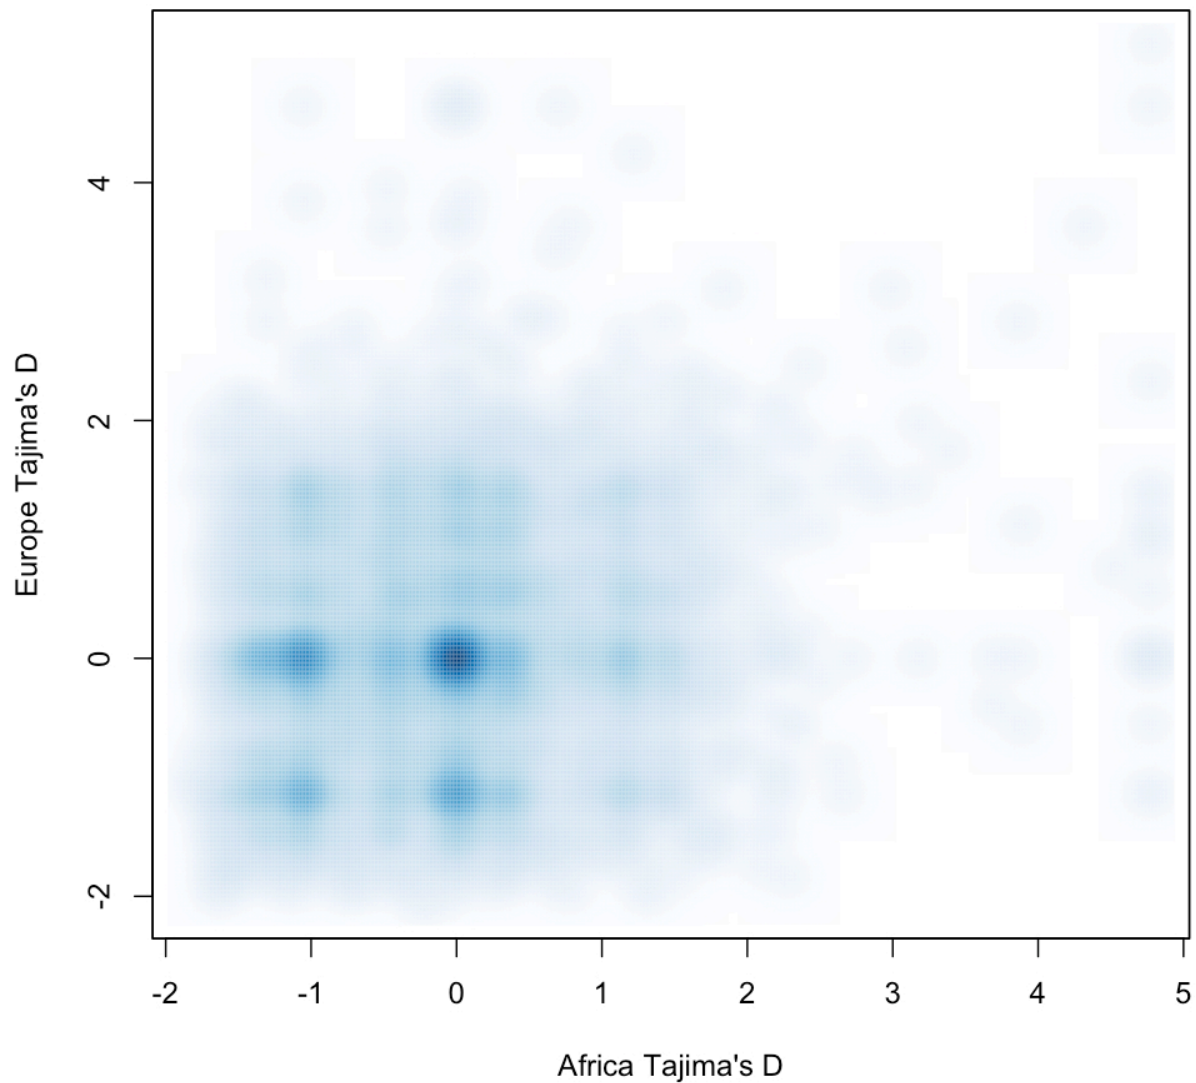

**Supplementary Figure 3.** Interaction network of the epidermal differentiation complex proteins encoded by the genes indicated in Figure 3A, showing correlated expression patterns, mutual crosslinking, and functional roles.

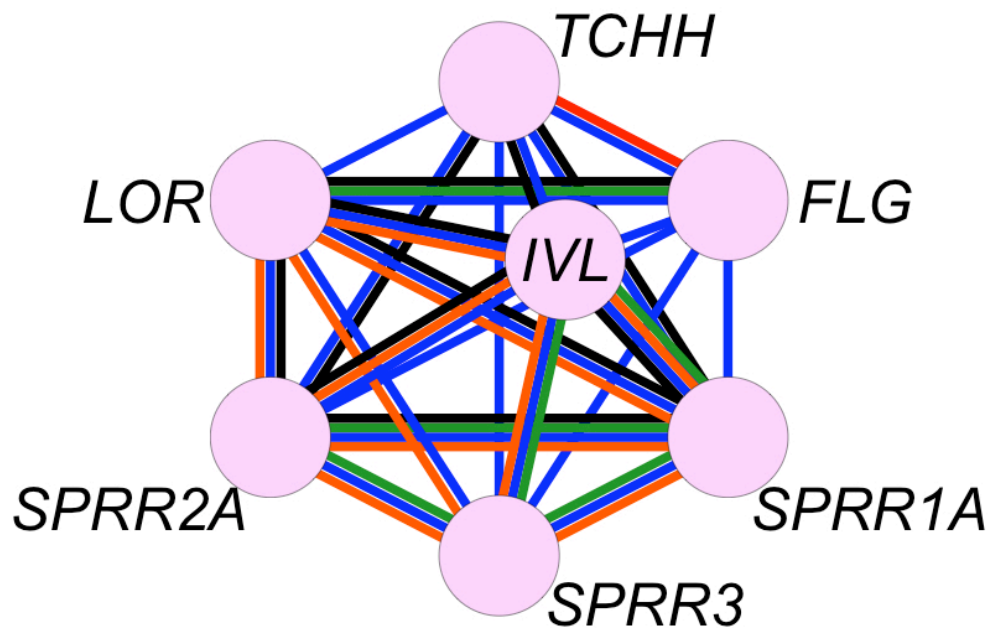

- crosslinked by transglutaminase in keratinocytes
- mutually crosslinked
- correlated expression
- cornified envelope precursor
- keratin filament associated intermediate

**Supplementary Figure 4.** Sliding window graph of exome polymorphism and divergence in the vicinity of *RTTN*. There are two independent spikes of high  $F_{ST}$  on either end of the gene, each associated with a high-frequency derived SNP on a different continent, making *RTTN* a candidate on both continents. *RTTN* is thought to help to maintain the cilia that provide the leftward nodal flow of extra-embryonic fluid, resulting in left-right asymmetry.

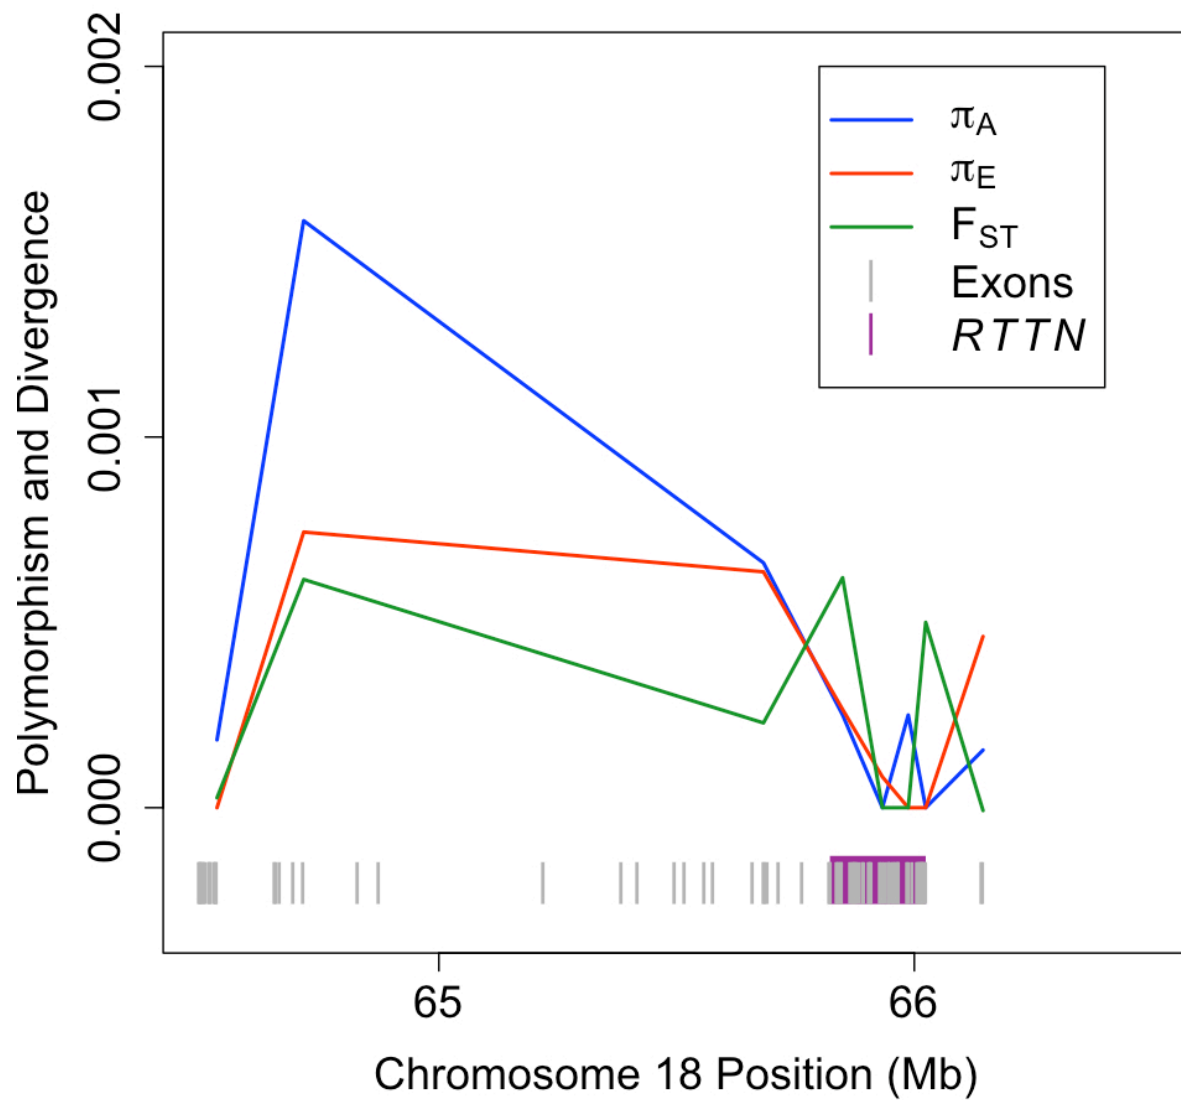

**Supplementary Figure 5.** Sliding window graph of exome polymorphism and divergence in the vicinity of *HS1BP3*, a motor neuron gene that may be linked to essential tremor or Parkinson disease. This locus is a novel candidate target of selection that does not appear on the evaluated candidate lists. It shows an unusually low ratio of  $\pi_A$  to  $\pi_E$ , coupled with high  $F_{ST}$ .

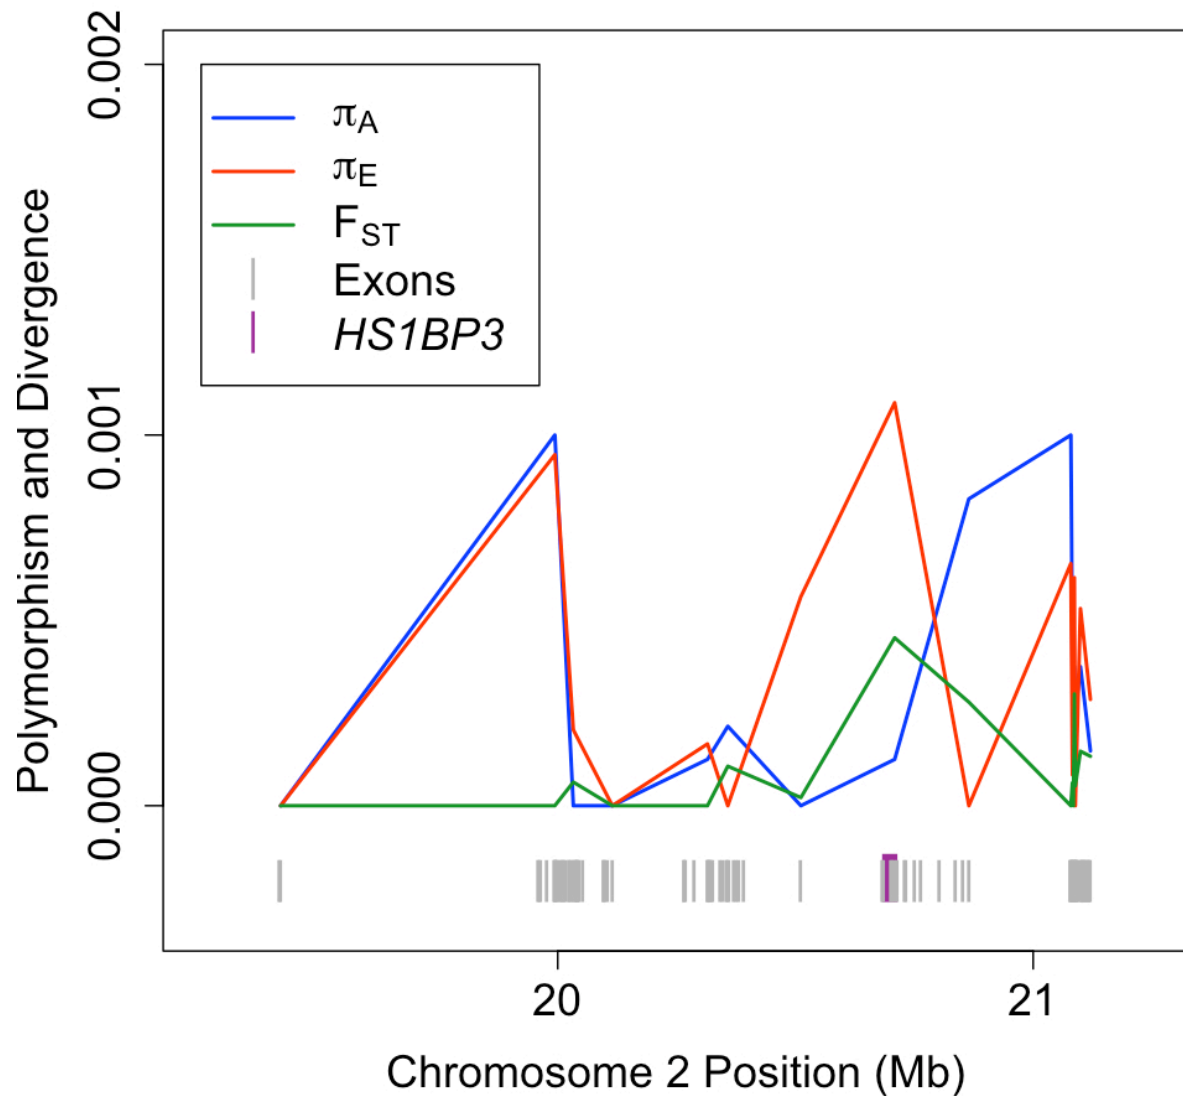

**Supplementary Figure 6.** Polymorphism versus sequence length for all included regions. The y-axis shows global  $\pi$ . The x-axis shows the log of the total length of exon sequence in each region, in bp. Color darkness is proportional to the density of 100-kb regions in that vicinity. Regions with less than 500 bp exon sequence have been excluded. The effect of lengths over 500 bp on the mean and variance of  $\pi$  is not substantial, and we have ignored it in our analyses.

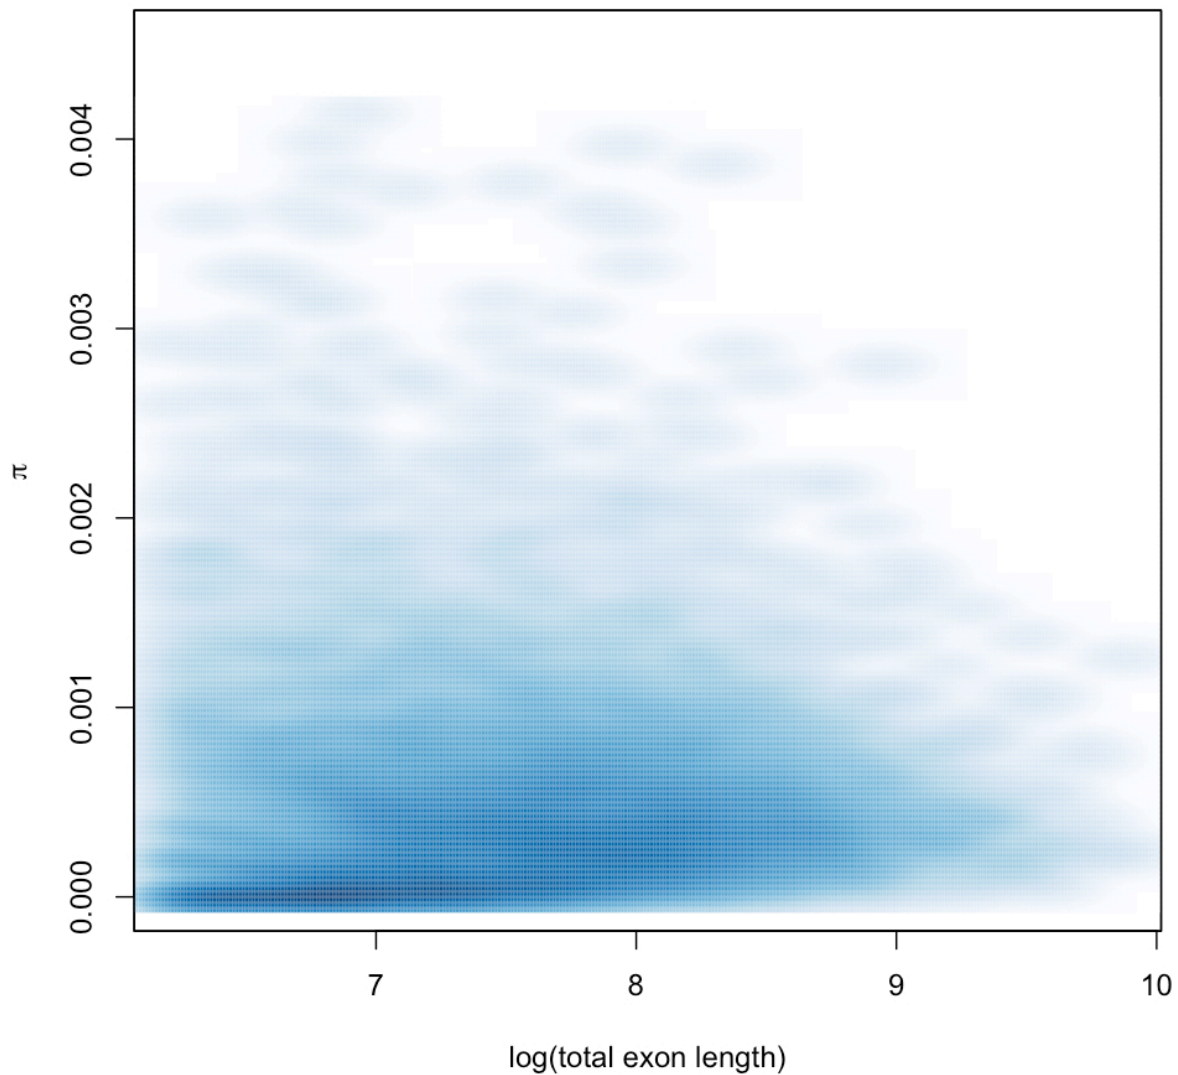

Supplement: Tennessen_Supplementary_Figures.pdf [file Tennessen_Supplementary_Figures.pdf]
